# Supplementary material for: A gene expression signature identifying transient DNMT1 depletion as a causal factor of cancer-germline gene activation in melanoma
Source: PubMed Central journal article supplement (PMC4620642; doi:10.1186/s13148-015-0147-4), 2015-10-26
Supplement: 13148_2015_147_MOESM2_ESM.pdf [file 13148_2015_147_MOESM2_ESM.pdf]

**Table S1****List of 14 genes overexpressed in melanoma cell lines with a CGAS $\geq$ 7 (max 10% FDR)**

| GeneNames | Mean in<br>CGAS $\leq$ 2 | Mean in<br>CGAS $\geq$ 7 | Fold diff | pval_wilcox | FDR.indep |
|-----------|--------------------------|--------------------------|-----------|-------------|-----------|
| MAGEA6    | 82.62                    | 5544.95                  | 67.1      | 2.14E-10    | 2.16E-06  |
| MAGEA4    | 21.96                    | 1464.54                  | 66.7      | 5.71E-06    | 1.69E-02  |
| MAGEA3    | 103.52                   | 5363.77                  | 51.8      | 2.14E-10    | 2.16E-06  |
| MAGEA12   | 72.45                    | 3205.07                  | 44.2      | 2.14E-10    | 2.16E-06  |
| MAGEA2    | 38.42                    | 1681.1                   | 43.8      | 2.77E-06    | 1.01E-02  |
| MAGEA2B   | 23.48                    | 935.63                   | 39.9      | 1.46E-07    | 8.19E-04  |
| MAGEA1    | 57.22                    | 1053.7                   | 18.4      | 2.14E-10    | 2.16E-06  |
| MAGEA5    | 69.6                     | 1106.35                  | 15.9      | 2.14E-10    | 2.16E-06  |
| MAGEB2    | 23.94                    | 370.81                   | 15.5      | 1.86E-05    | 4.93E-02  |
| XAGE1A    | 96.77                    | 1483.34                  | 15.3      | 2.97E-08    | 2.14E-04  |
| CSAG2     | 44.65                    | 663.59                   | 14.9      | 1.50E-09    | 1.26E-05  |
| DSCR8     | 73.24                    | 759.71                   | 10.4      | 5.71E-06    | 1.69E-02  |
| TPTE      | 11.21                    | 105.45                   | 9.4       | 1.46E-07    | 8.19E-04  |
| MAGEA10   | 80.56                    | 234.41                   | 2.9       | 3.40E-07    | 1.71E-03  |

**List of 192 PCCG genes**

|              |              |              |
|--------------|--------------|--------------|
| MAGEA6       | GAGE1        | ISL1         |
| MAGEA4       | DNER         | VCX2         |
| MAGEA3       | HAPLN1       | RASEF        |
| MAGEA12      | MAGEC2       | TM4SF18      |
| MAGEA2       | MDM2         | LOC100129794 |
| CT45A1       | LOC643401    | HNMT         |
| MAGEA1       | LOC51152     | HTR2C        |
| MAGEA5       | PXDNL        | PDE11A       |
| MAGEB2       | FAM133A      | ODZ1         |
| XAGE1A       | LOC100289026 | SPP1         |
| CSAG2        | LOC100509302 | NCRNA00281   |
| CT45A1       | GABRG2       | HRASLS       |
| MAGEA11      | CFI          | PAGE1        |
| CTAG2        | LOC100507039 | LOC100289550 |
| CTAG1A       | LOC401233    | CPVL         |
| DSCR8        | RAB3IP       | SLC25A21     |
| TPTE         | MAGEA10      | LOC375295    |
| LOC100271840 | PCDHB14      | MAL2         |
| MAGEC1       | CLCN4        | ESRRG        |
| GAGE1        | ANGPT1       | TXK          |
| GAGE3        | DEPDC6       | C18orf2      |
| GAGE1        | LOC340340    | CSMD1        |
| FSTL5        | GABRA2       | SULF2        |
| LOC283352    | PCDHB3       | LOC644450    |
| RAPGEF4      | CXorf48      | AGT          |
| GAGE12C      | BAGE         | PLK2         |
| LOC339535    | ABCC2        | FLJ39632     |
| GAGE12F      | ZNF385D      | CDKN1A       |
| NEFL         | NXT2         | PTGFRN       |
| CYTL1        | HS6ST2       | ICK          |

|                     |                     |                     |
|---------------------|---------------------|---------------------|
| <i>OLIG2</i>        | <i>CDH6</i>         | <i>LOC100505490</i> |
| <i>TSPAN31</i>      | <i>PTPRG</i>        | <i>RPS27L</i>       |
| <i>EPHX1</i>        | <i>IGF1R</i>        | <i>ZMYM6</i>        |
| <i>PITX2</i>        | <i>LOC389834</i>    | <i>SERPINA1</i>     |
| <i>RPL22L1</i>      | <i>TMEM106B</i>     | <i>LEPREL4</i>      |
| <i>JAKMIP2</i>      | <i>RNF180</i>       | <i>NPL</i>          |
| <i>LOC646627</i>    | <i>TP53TG1</i>      | <i>LMBRD2</i>       |
| <i>CCDC152</i>      | <i>LOC100132288</i> | <i>KIAA1324L</i>    |
| <i>CCDC121</i>      | <i>KCNJ2</i>        | <i>SEPP1</i>        |
| <i>UXS1</i>         | <i>NOL3</i>         | <i>NLGN4X</i>       |
| <i>LOC642236</i>    | <i>MID1</i>         | <i>DUSP19</i>       |
| <i>HHAT</i>         | <i>ARSD</i>         | <i>C18orf32</i>     |
| <i>NEAT1</i>        | <i>SPCS3</i>        | <i>TNPO1</i>        |
| <i>MAGEB6</i>       | <i>PIGM</i>         | <i>LOC100216479</i> |
| <i>FGF14</i>        | <i>PTGR2</i>        | <i>EPT1</i>         |
| <i>RRM2B</i>        | <i>SPRED1</i>       | <i>TPK1</i>         |
| <i>IMPAD1</i>       | <i>PBX1</i>         | <i>SRD5A3</i>       |
| <i>LOC643783</i>    | <i>RNF213</i>       | <i>CENPBD1</i>      |
| <i>GPCPD1</i>       | <i>ERO1L</i>        | <i>MSI2</i>         |
| <i>CDS1</i>         | <i>RBM20</i>        | <i>AKT3</i>         |
| <i>CTTN</i>         | <i>CHCHD7</i>       | <i>SLC48A1</i>      |
| <i>GABRA3</i>       | <i>PLAG1</i>        | <i>GALNT7</i>       |
| <i>ABHD14A</i>      | <i>NARG2</i>        | <i>SLC7A11</i>      |
| <i>LOC100506783</i> | <i>PHLDA1</i>       | <i>APOOL</i>        |
| <i>LOC100132288</i> | <i>TNFRSF10B</i>    | <i>MAN1A2</i>       |
| <i>MECOM</i>        | <i>MDP1</i>         | <i>ORMDL2</i>       |
| <i>LOC100506691</i> | <i>TLCD1</i>        | <i>C16orf52</i>     |
| <i>LOC375010</i>    | <i>C6orf138</i>     | <i>TRIM69</i>       |
| <i>CD55</i>         | <i>SKAP2</i>        | <i>SLC16A4</i>      |
| <i>ELOVL6</i>       | <i>SPPL2A</i>       | <i>TRAM1L1</i>      |
| <i>NBEA</i>         | <i>DIP2A</i>        | <i>SBNO1</i>        |
| <i>ETNK1</i>        | <i>TTC30A</i>       | <i>LRPAP1</i>       |
| <i>AMACR</i>        | <i>ZMAT3</i>        | <i>LOC100129361</i> |
| <i>TIGD1</i>        | <i>RNASEL</i>       | <i>NAPRT1</i>       |

#### List of 64 ICCG genes

|                 |                |                 |
|-----------------|----------------|-----------------|
| <i>ACAT2</i>    | <i>CSTF3</i>   | <i>LPAR3</i>    |
| <i>ANGPT2</i>   | <i>DIAPH3</i>  | <i>MICB</i>     |
| <i>ASF1B</i>    | <i>DSC3</i>    | <i>MKI67</i>    |
| <i>ASPM</i>     | <i>FAM201A</i> | <i>MTF2</i>     |
| <i>C12orf48</i> | <i>FSD1L</i>   | <i>N4BP2L1</i>  |
| <i>C6orf174</i> | <i>HAUS6</i>   | <i>NAA38</i>    |
| <i>CCDC18</i>   | <i>HELLS</i>   | <i>NAV1</i>     |
| <i>CCNA2</i>    | <i>HNRNPA3</i> | <i>NET1</i>     |
| <i>CCNB1</i>    | <i>HNRPDL</i>  | <i>NUDT5</i>    |
| <i>CDC20</i>    | <i>ITGAL</i>   | <i>PDZRN3</i>   |
| <i>CDCA7</i>    | <i>KIF11</i>   | <i>PHF19</i>    |
| <i>CDCA7L</i>   | <i>KIF15</i>   | <i>PLK4</i>     |
| <i>CDK1</i>     | <i>KIF2C</i>   | <i>RAD51AP1</i> |
| <i>CDKN2A</i>   | <i>LBH</i>     | <i>RBM17</i>    |
| <i>CELF2</i>    | <i>LHX2</i>    | <i>RNASEH2B</i> |
| <i>CKS2</i>     | <i>LMO4</i>    | <i>RUNX3</i>    |

*SAMD5*  
*SCAI*  
*SENP6*  
*SH2D1A*  
*SMC4*  
*SMC6*

*TAF5*  
*TFDP2*  
*TIPRL*  
*TRIM59*  
*TTK*  
*UB3*

*VRK1*  
*WNT4*  
*ZNF738*  
*ZNF823*
