# Supplementary material for: A gene expression signature identifying transient DNMT1 depletion as a causal factor of cancer-germline gene activation in melanoma
Source: PubMed Central journal article supplement (PMC4620642; doi:10.1186/s13148-015-0147-4), 2015-10-26
Supplement: 13148_2015_147_MOESM4_ESM.pdf [file 13148_2015_147_MOESM4_ESM.pdf]

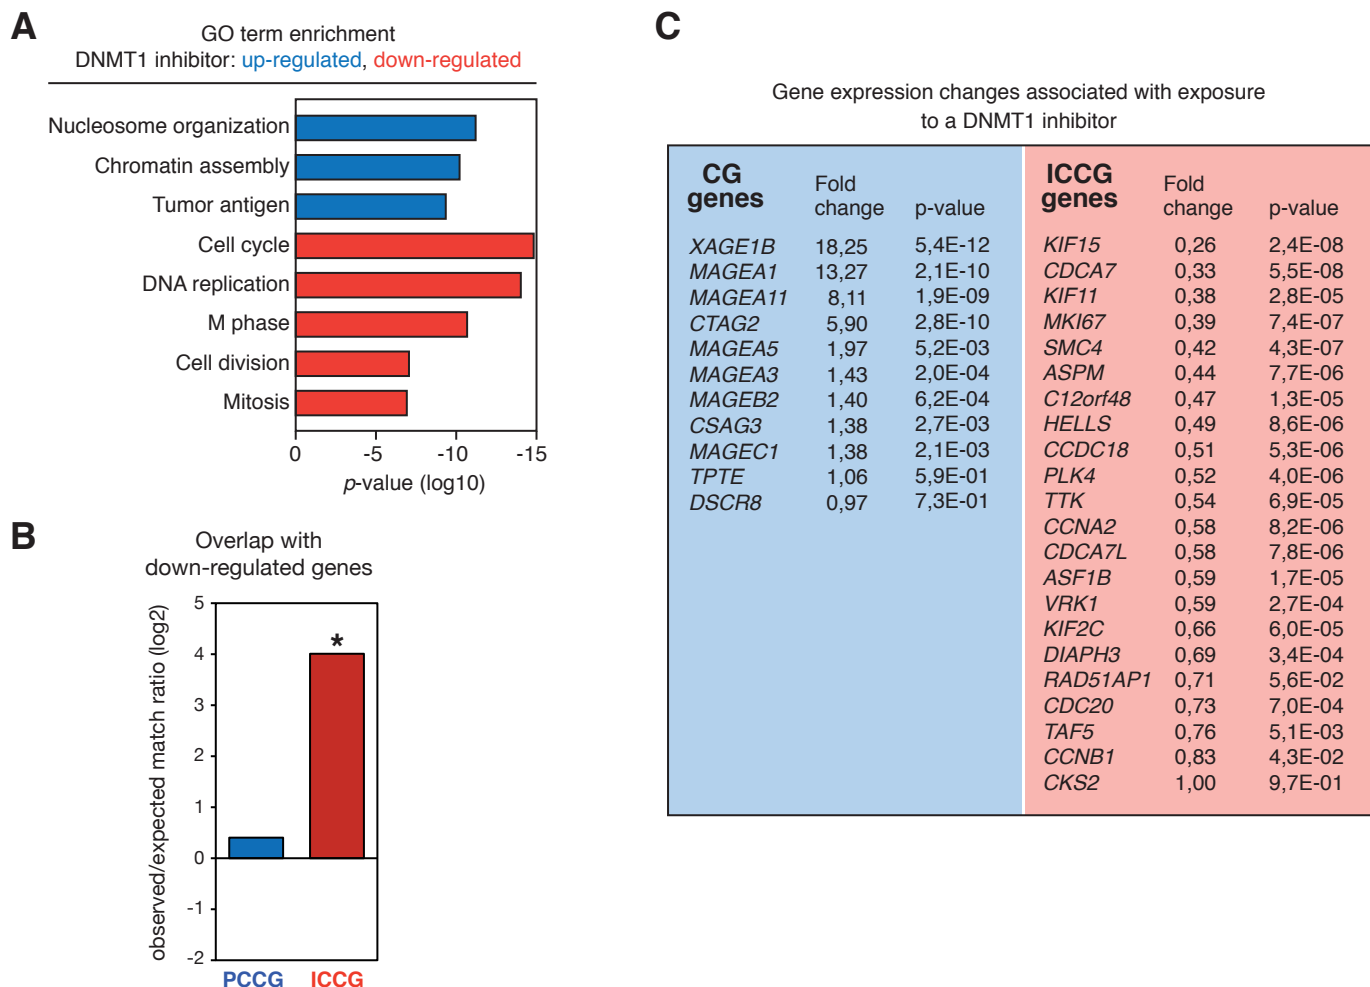

**Figure S3. Exposure of HCT116 cells to DNMT1 inhibitor decitabine leads to down-regulation of cell mitosis/division-associated genes, and these genes show significant overlap with the group of ICCG genes. A)** Genes showing transcriptional up-regulation (fold change  $\geq 4$ , adjusted  $p$ -value  $\leq 0.01$ ,  $n=165$ ) or down-regulation (fold change  $\leq 0.5$ , adjusted  $p$ -value  $< 0.01$ ,  $n=172$ ) upon exposure to the DNMT1 inhibitor (GSE30985 dataset) were analyzed for enrichment of ontology terms. **B)** Overlap between down-regulated genes and ICCG genes was analyzed, and is expressed as observed/expected match ratio ( $\log_2$ ). Fisher test was used for statistical analysis: \*  $p \leq 0.05$ . **C)** Changes of expression observed in cells treated with the DNMT1 inhibitor are given for the 11 reference CG genes, and for ICCG genes (those that overlap with the down-regulated group of genes in the Sen et al. study; see Fig. S2).
