# Supplementary material for: A gene expression signature identifying transient DNMT1 depletion as a causal factor of cancer-germline gene activation in melanoma
Source: PubMed Central journal article supplement (PMC4620642; doi:10.1186/s13148-015-0147-4), 2015-10-26
Supplement: 13148_2015_147_MOESM5_ESM.pdf [file 13148_2015_147_MOESM5_ESM.pdf]

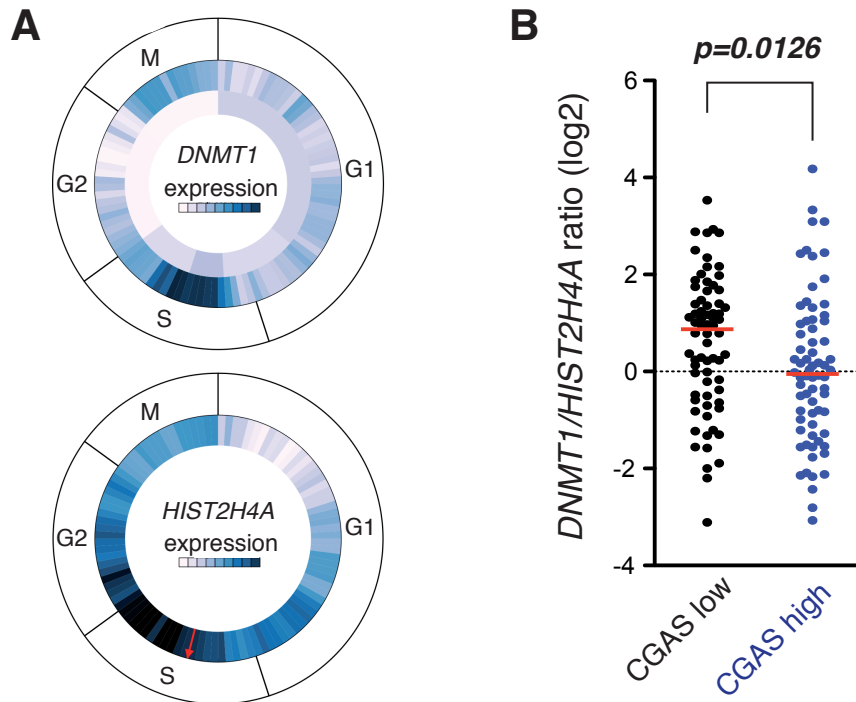

**Figure S4. Even after adjustment for cell proliferation, *DNMT1* mRNA expression levels remain lower in CGAS-high melanoma samples.** As *DNMT1* shows a peak of mRNA expression during the S phase of the cell cycle, reduced expression of this gene may reflect differences in cell proliferation rates rather than transcriptional down-regulation. To discriminate between these two possibilities, we resorted to a previously described strategy, wherein *DNMT1* expression levels were reported to that of another gene (*HIST2H4A*) showing peak expression during the S-phase (Lee et al. Proc Natl Acad Sci USA, 1996, 93:10366). **A)** Cell cycle-dependent mRNA expression levels, as provided by Cyclebase, confirm peak expression of *DNMT1* and *HIST2H4A* during the S phase. **B)** *DNMT1*/*HIST2H4A* expression ratios were calculated (log2), and are represented in CGAS-low and CGAS-high melanoma samples (red bar at median). Statistical analysis was performed with the Mann-Whitney test. mRNA ratios remained lower in CGAS-high melanoma samples, thereby excluding differential proliferation rates as a cause of reduced *DNMT1* mRNA expression.
