# Supplementary material for: A gene expression signature identifying transient DNMT1 depletion as a causal factor of cancer-germline gene activation in melanoma
Source: PubMed Central journal article supplement (PMC4620642; doi:10.1186/s13148-015-0147-4), 2015-10-26
Supplement: 13148_2015_147_MOESM7_ESM.pdf [file 13148_2015_147_MOESM7_ESM.pdf]

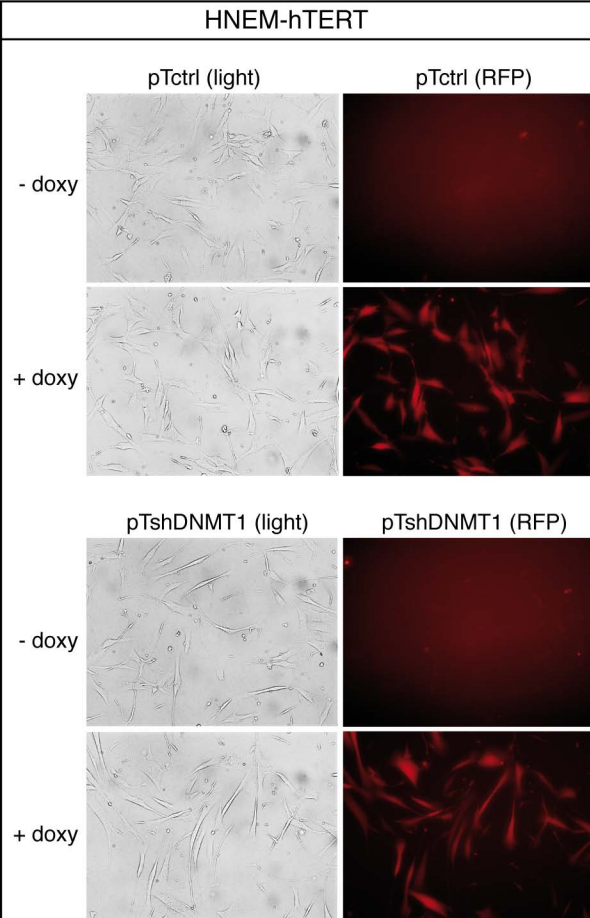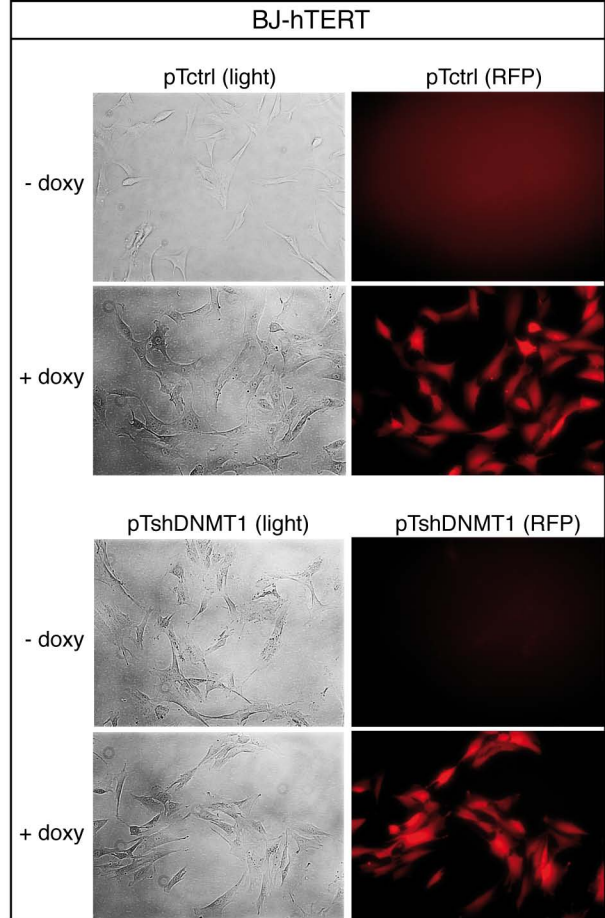

**Figure S6. Illustration of selected pTctrl and pTshDNMT1 clones derived from either HNEM-hTERT or BJ-hTERT cells.** Light and fluorescence microscopy images of selected clones, either without (- doxy) or after (+ doxy) treatment with 1  $\mu\text{g}/\text{mL}$  of doxycycline during 3 days. Selected clones show  $\sim 100\%$  tRFP positive cells after doxycycline exposure.
