# Supplementary material for: A gene expression signature identifying transient DNMT1 depletion as a causal factor of cancer-germline gene activation in melanoma
Source: PubMed Central journal article supplement (PMC4620642; doi:10.1186/s13148-015-0147-4), 2015-10-26
Supplement: 13148_2015_147_MOESM8_ESM.pdf [file 13148_2015_147_MOESM8_ESM.pdf]

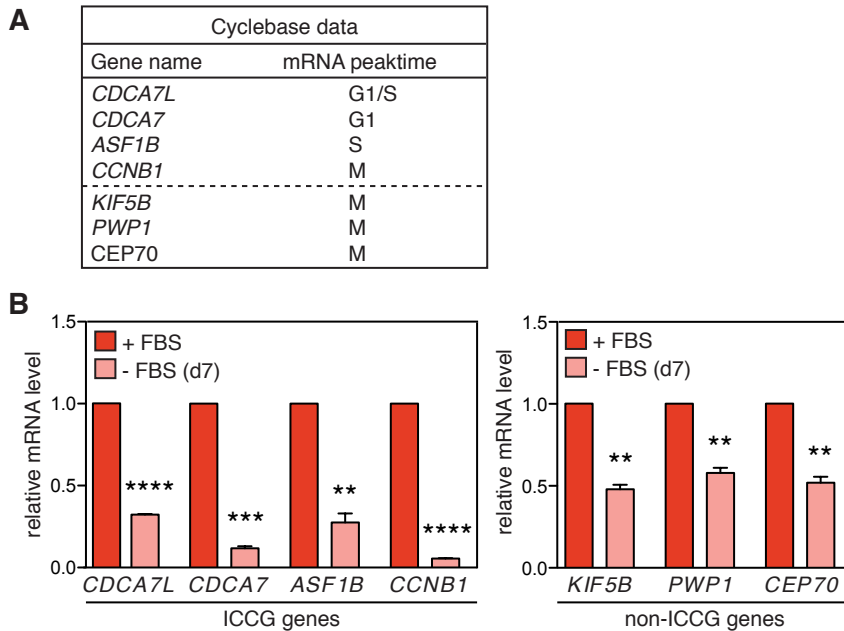

**Figure S7. Evidence of cell cycle-associated expression of representative ICGG and non-ICGG genes.** *A*, Cyclebase data of cell-cycle mRNA expression peaktime for the 4 representative ICGG genes and the 3 non-ICGG genes (*KIF5B*, *PWP1* and *CEP70*). *B*, Relative mRNA levels of the genes were determined by RT-qPCR in BJ-hTERT fibroblasts cultured in the absence of serum during 7 days (- FBS d7). Values derived from 3 independent experiments and are expressed relative to the levels found in cells cultured in the presence of serum (+ FBS). \*\* $p < 0.01$ , \*\*\* $p < 0.001$ , \*\*\*\* $p < 0.0001$ .
