# Supplementary material for: A gene expression signature identifying transient DNMT1 depletion as a causal factor of cancer-germline gene activation in melanoma
Source: PubMed Central journal article supplement (PMC4620642; doi:10.1186/s13148-015-0147-4), 2015-10-26
Supplement: 13148_2015_147_MOESM9_ESM.pdf [file 13148_2015_147_MOESM9_ESM.pdf]

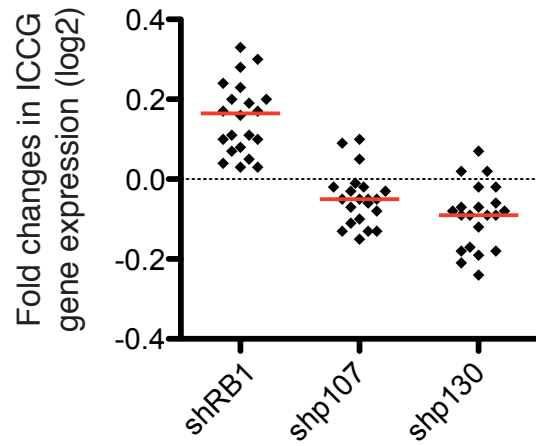

**Figure S8. shRNA-dependent inhibition of RB1, but not of p107 and p130, induces up-regulation of ICGG genes in human fibroblasts.** Microarray expression data were extracted from the GSE19864 dataset (Chicas et al., Cancer Cell, 2010, 17:376). Fold change in expression is given for the 21 ICGG genes that overlapped with the Sen set of genes (see Fig. S2), and corresponds to the ratio (log<sub>2</sub>) of probe intensities between the indicated condition and control cells.
