# Supplementary material for: A gene expression signature identifying transient DNMT1 depletion as a causal factor of cancer-germline gene activation in melanoma
Source: PubMed Central journal article supplement (PMC4620642; doi:10.1186/s13148-015-0147-4), 2015-10-26
Supplement: 13148_2015_147_MOESM10_ESM.pdf [file 13148_2015_147_MOESM10_ESM.pdf]

**Table S2.** qPCR primers and probes

| <b>Target gene</b> | <b>Forward sequence 5' to 3'</b> | <b>Reverse sequence 5' to 3'</b> | <b>Probe sequence 5' to 3'</b> |
|--------------------|----------------------------------|----------------------------------|--------------------------------|
| <i>ACT1NB</i>      | CCCTGGACTTCGAGCAAGAGAT           | AAGGTAGTTTCGTGGATGCCACA          | SybrGreen                      |
| <i>DNMT1</i>       | CCTCAGCTACTGCGACTACT             | GCACTCATGTCCTTACAGATGT           | ATGGTCCTGAAGCTCACCTCC          |
| <i>MAGEA1</i>      | GCCGAAGGAACCTGACC                | ACTGGGTTGCCTCTGTCG               | TGTGTGCAGGCTGCCACCTCCT         |
| <i>MAGEA3</i>      | GTCGTCGGAAATTGGCAGTAT            | GCAGGTGGCAAAGATGTACAA            | AAAGCTTCCAGTTCCTT              |
| <i>CTCF1</i>       | CCCTCATTACAGACCAGAA              | CTGATCCACACTTCTCCGAA             | CCGACAGAAGCAACTTCTAAACGCT      |
| <i>CDCA7L</i>      | CTATGGGGAGGATGTCAGAT             | GGTGGCTGGTTCTGTTTGT              | TGTTAAGGAATATCTGGAGAGCTTACAAA  |
| <i>CDCA7</i>       | CACTGGGCTCTACTTGTATC             | GCAGATTCCTCGACAAGGCG             | SybrGreen                      |
| <i>ASF1B</i>       | GGACGACCTGGAGTGGAAGAT            | CATCAGTCTCTGGGATGAGGGA           | SybrGreen                      |
| <i>CCNB1</i>       | CATGCAGAATAATTGTGTGCC            | AGGAAGTGCAAAGGTAGAGGC            | SybrGreen                      |
| <i>PWP1</i>        | AAGGGCTTCGGGTCTGGGATA            | GTGGTGCCACCGCAGTTGCA             | SybrGreen                      |
| <i>KIF5B</i>       | GCTTGATGACAAGGATGAAGAA           | GCTTGAAGGCGATTCAGCTCA            | SybrGreen                      |
| <i>CEP70</i>       | TCAGGTGCTGTGTAGCATCAA            | GCCAAGGTACCAGTTCTGCAGATA         | SybrGreen                      |
| <i>d2EGFP</i>      | ACGACGGCAACTACAAGACC             | CTCAGGTAGTGGTTGTCGGG             | SybrGreen                      |
| <i>NEO</i>         | TAAC TAGTATGATTGAACAAGATGGATTGCA | TATGCGCCGCTCAGAAGA AACTCGTCAAGAA | CGGTGCCCTGAATGAACTGCA          |
